# Supplementary material
Source: PubMed Central journal article supplement (PMC10427946)
Supplement: jama-e2312739-s003.pdf [file jama-e2312739-s003.pdf]

## Data Sharing Statement

Stamm. Door-in-Door-out Times for Interhospital Transfer of Patients With Stroke. *JAMA*.  
Published August 15, 2023. doi:10.1001/jama.2023.12739

### Data

**Data available:** No

### Additional Information

**Explanation for why data not available:** Data is available by application to the American Heart Association.
